# Supplementary material for: Protein manipulation using single copies of short peptide tags in cultured cells and in Drosophila melanogaster
Source: PubMed Central journal article supplement (PMC7990863; doi:10.1242/dev.191700), 2021-03-16
Supplement: develop-148-191700-s1.pdf [file develop-148-191700-s1.pdf]

## Figure S1A

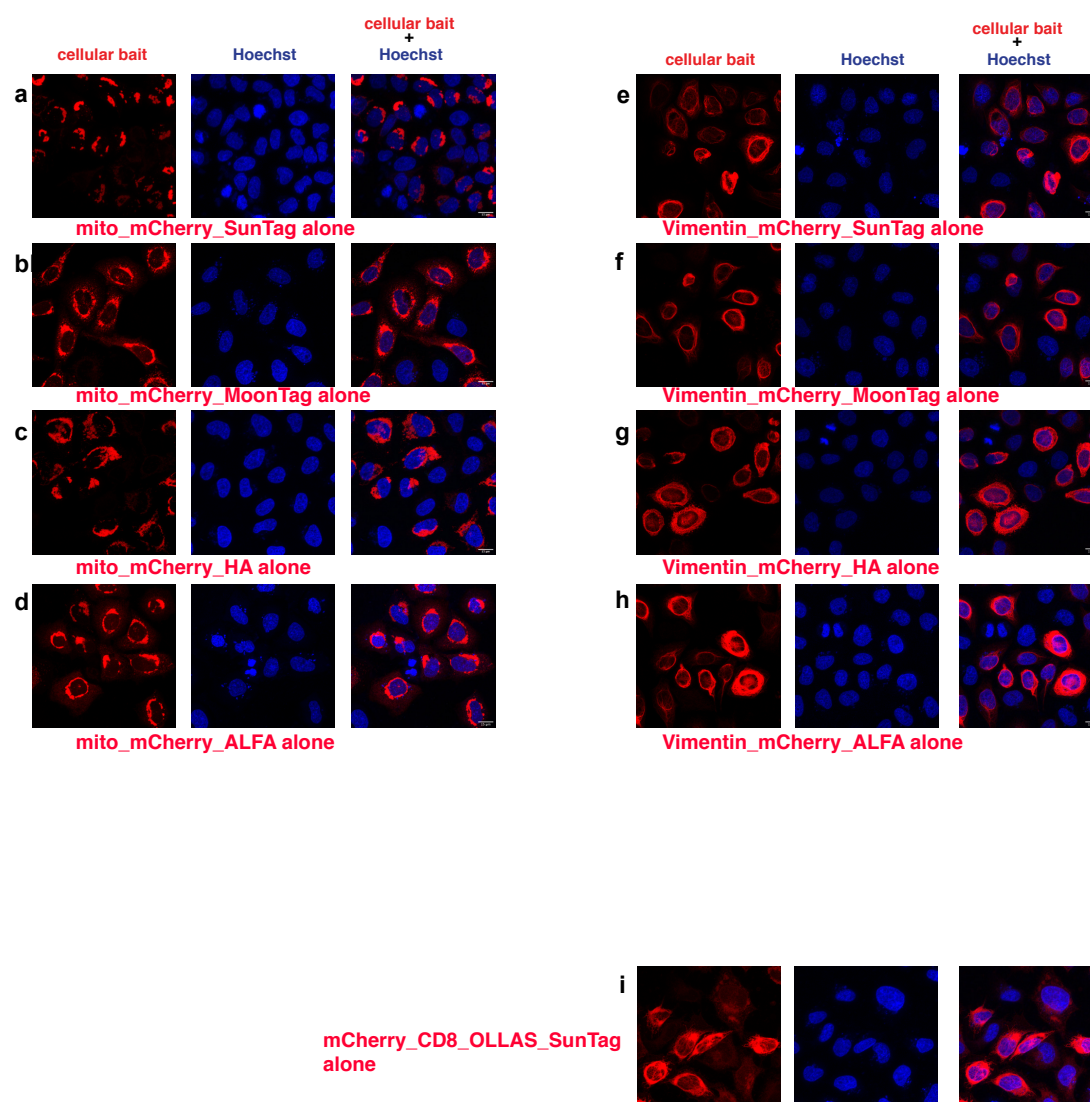

**Figure S1A. Intracellular expression of mitochondrial, filament and membrane baits**  
 Confocal images of HeLa cells transiently transfected with (a) mito\_mCherry\_SunTag, (b) mito\_mCherry\_MoonTag, (c) mito\_mCherry\_HA, (d) mito\_mCherry\_ALFA, (e) Vimentin\_mCherry\_SunTag, (f) Vimentin\_mCherry\_MoonTag, (g) Vimentin\_mCherry\_HA, (h) Vimentin\_mCherry\_ALFA, (i) mCherry\_CD8\_OLLAS\_SunTag. The first column of each row indicated by the letter represents the mCherry channel (red), the second column is the nuclear Hoechst staining (blue) and the third column is the overlay of the two channels (with the scale bar in white (15  $\mu$ m)), showing the localization of the mitochondrial (a-d), filaments (e-h) and membrane (i) baits. Images were taken 24 hours post transfection. Transfected constructs are indicated at bottom of each row and the single and merge channels are indicated at the top of the respective columns. The figures are from a representative experiment, performed at least three times.

Figure S1B

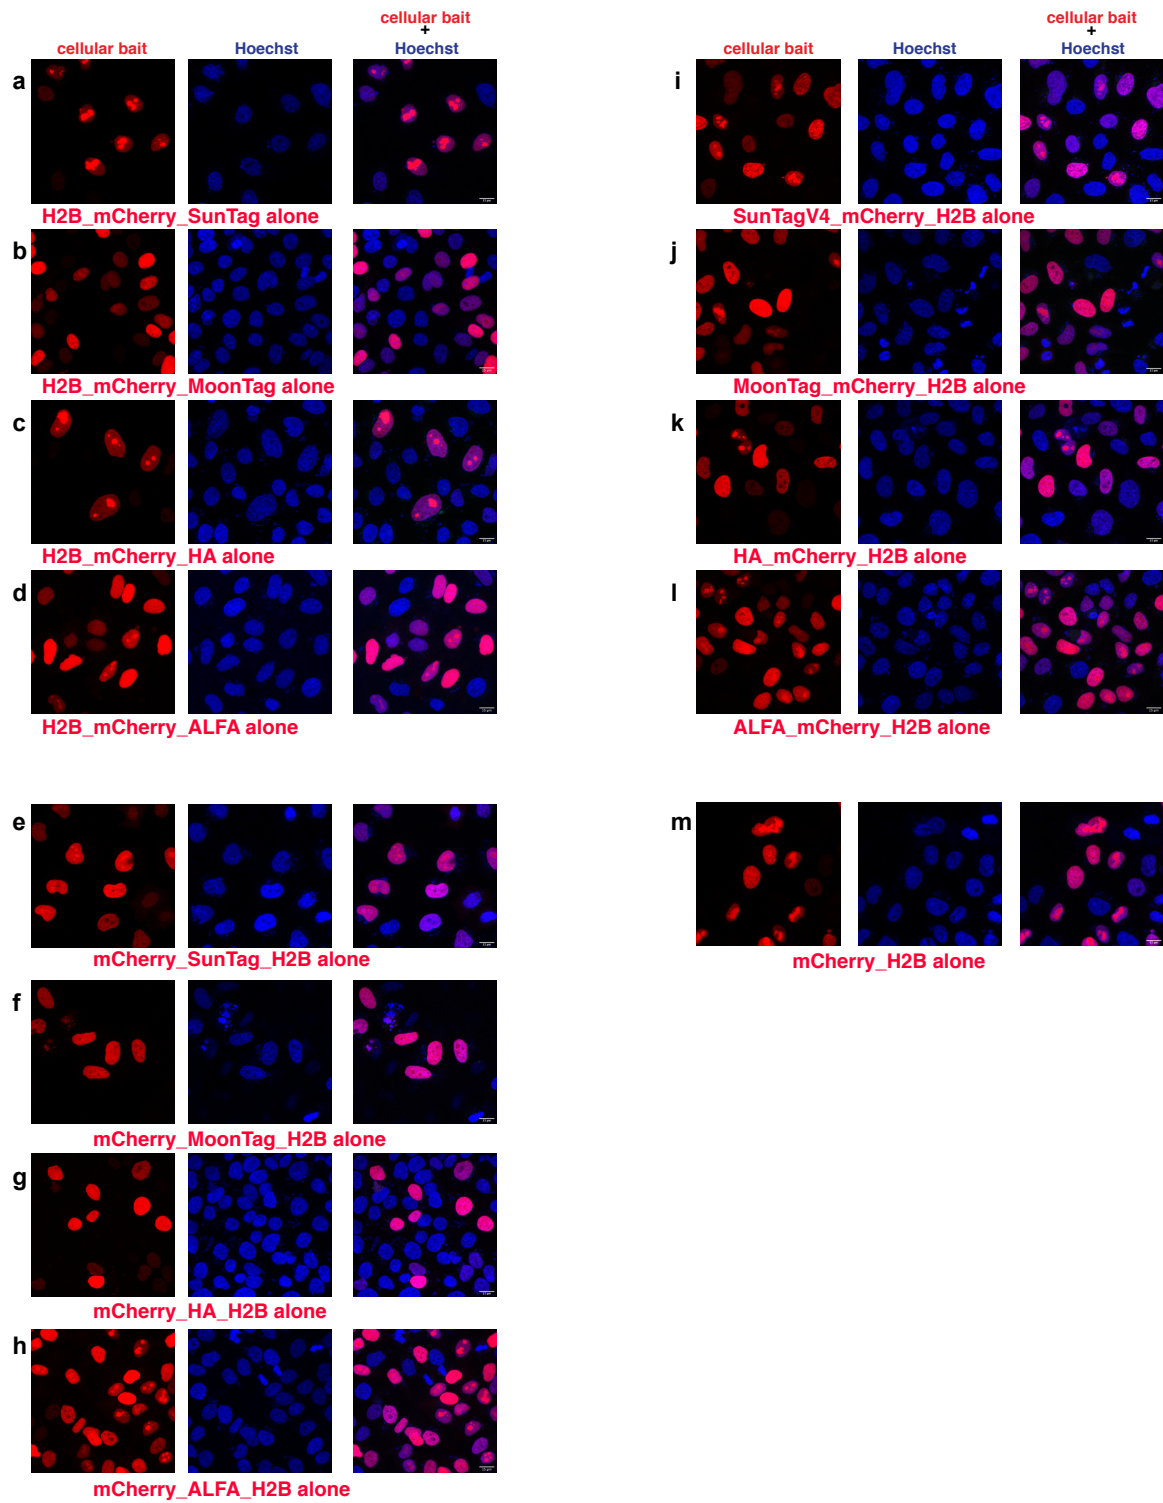

**Figure S1B. Intracellular expression of the nuclear baits**

Confocal images of HeLa cells transiently transfected with **(a)** H2B\_mCherry\_SunTag, **(b)** H2B\_mCherry\_MoonTag, **(c)** H2B\_mCherry\_HA, **(d)** H2B\_mCherry\_ALFA, **(e)** mCherry\_SunTag\_H2B, **(f)** mCherry\_MoonTag\_H2B, **(g)** mCherry\_HA\_H2B, **(h)** mCherry\_ALFA\_H2B, **(i)** SunTag\_mCherry\_H2B, **(j)** MoonTag\_mCherry\_H2B, **(k)** HA\_mCherry\_H2B, **(l)** ALFA\_mCherry\_H2B, **(m)** mCherry\_H2B. The first column of each row indicated by the letter represents the mCherry channel (red), the second column is the nuclear Hoechst staining (blue) and the third column is the overlay of the two channels (with the scale bar in white (15  $\mu$ m)), showing the localization of the nuclear baits. Images were taken 24 hours post transfection. Transfected constructs are indicated at bottom of each row and the single and merge channels are indicated at the top of the respective columns. The figures are from a representative experiment, performed at least three times.

Figure S2

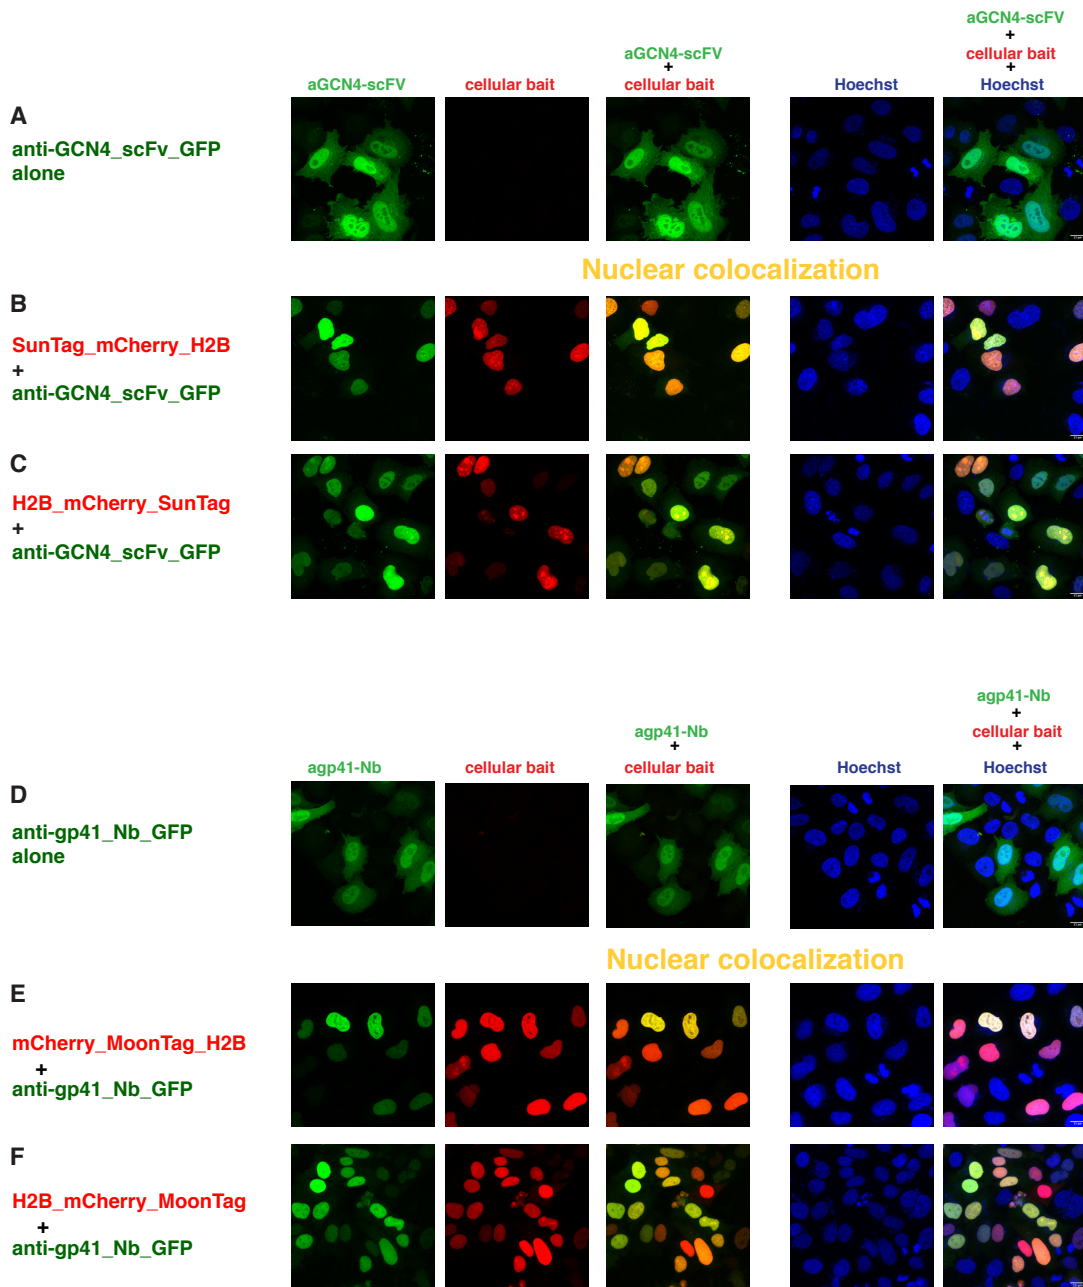

**Figure S2. Intracellular binding of anti-GCN4\_scFv\_GFP and anti-gp41\_Nb\_GFP to nuclear**

**baits** Confocal images of HeLa cells transiently transfected with **(A)** anti-GCN4\_scFv\_GFP alone; the combination of anti-GCN4\_scFv\_GFP and **(B)** SunTag\_mCherry\_H2B; **(C)** H2B\_mCherry\_SunTag; **(D)** anti-gp41\_Nb\_GFP alone; the combination of anti-gp41\_Nb\_GFP and **(E)** mCherry\_MoonTag\_H2B; **(F)** H2B\_mCherry\_MoonTag. The first column represents the GFP channel (green), the second column is the mCherry channel (red), the third column is the overlay of the two channels, showing the colocalization (indicated in yellow) of the antiGCN4\_scFv **(A-C)** or the anti-gp41\_Nb **(D-F)** with the respectively tagged nuclear baits; the fourth column represents the nuclear Hoechst staining (blue) and the fifth column is the merge of all three channels (with the scale bar in white (15  $\mu$ m) on the bottom right corner). Images were taken 24 hours post transfection. Transfected constructs are indicated at the left of each row and the single and merge channels are indicated at the top of the respective columns. The figures are from a representative experiment, performed at least three times.

Figure S3

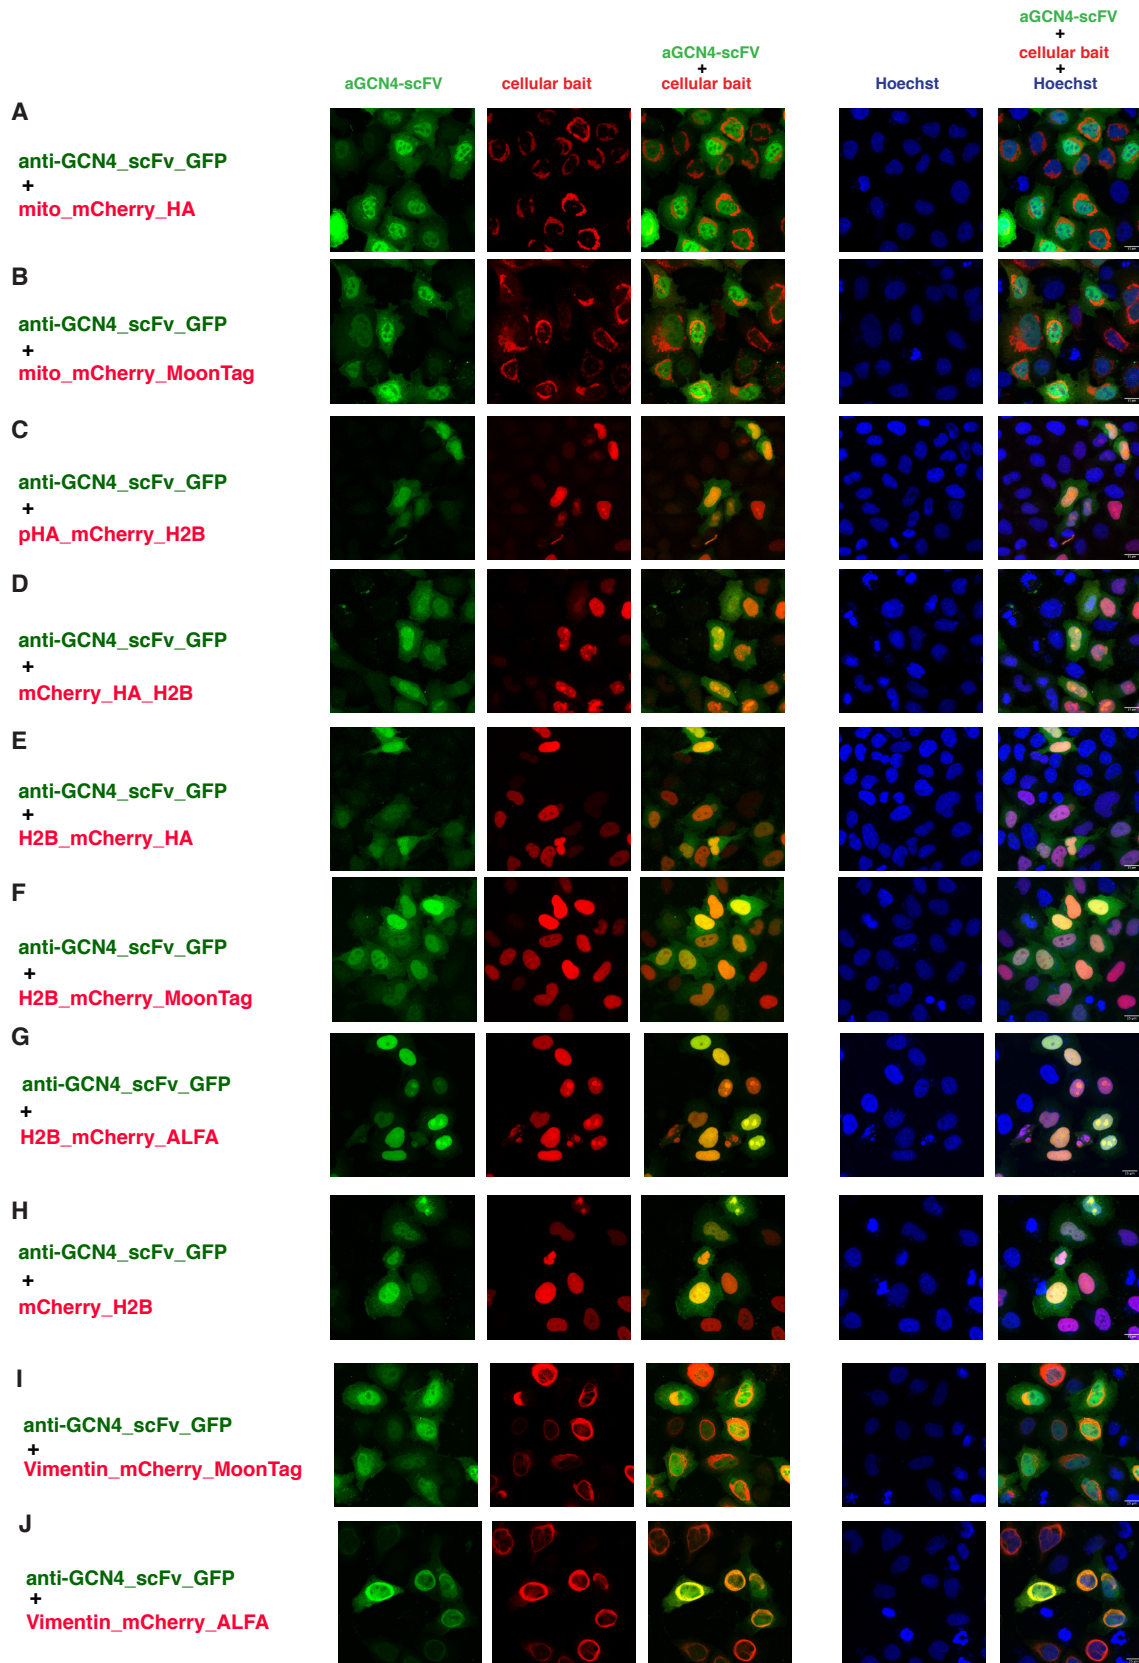

### Figure S3. Negative controls of anti-GCN4\_scFv\_GFP

Confocal images of HeLa cells transiently transfected with the combination of anti-GCN4\_scFv\_GFP and (A) mito\_mCherry\_HA, (B) mito\_mCherry\_MoonTag, (C) HA\_mCherry\_H2B, (D) mCherry\_HA\_H2B, (E) H2B\_mCherry\_HA, (F) H2B\_mCherry\_MoonTag, (G) H2B\_mCherry\_ALFA, (H) mCherry\_H2B, (I) Vimentin\_mCherry\_MoonTag, (J) Vimentin\_mCherry\_ALFA. The first column represents the GFP channel (green), the second column is the mCherry channel (red), the third column is the overlay of the two channels, showing the colocalization (indicated in yellow) of the anti-GCN4\_scFv with mitochondrial (A-B), nuclear (C-H), and filaments (I-J) baits carrying different tags; the fourth column represents the nuclear Hoechst staining (blue) and the fifth column is the merge of all three channels (with the scale bar in white (15  $\mu$ m) on the bottom right corner). Images were taken 24 hours post transfection. Transfected constructs are indicated at the left of each row and the single and merge channels are indicated at the top of the respective columns. The figures are from a representative experiment.

Figure S4

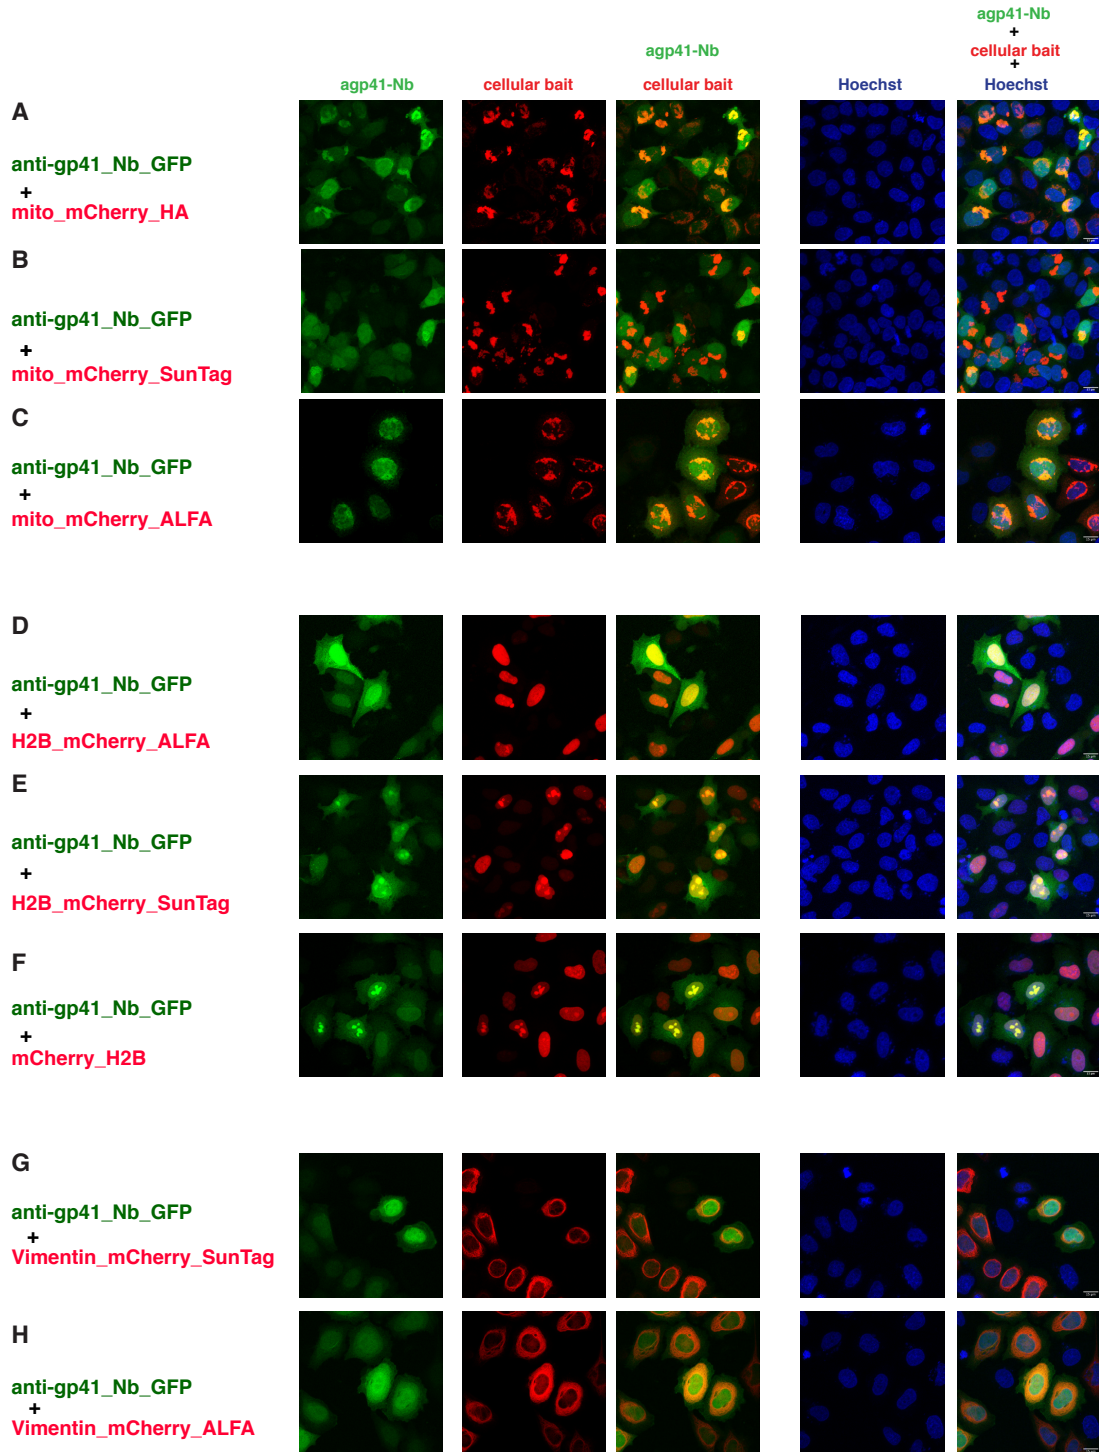



#### Figure S4. Negative controls of anti-gp41\_Nb\_GFP

Confocal images of HeLa cells transiently transfected with the combination of anti-gp41\_Nb\_GFP and **(A)** mito\_mCherry\_HA, **(B)** mito\_mCherry\_SunTag, **(C)** mito\_mCherry\_ALFA **(D)** H2B\_mCherry\_ALFA, **(E)** H2B\_mCherry\_SunTag, **(F)** mCherry\_H2B, **(G)** Vimentin\_mCherry-SunTag, **(H)** Vimentin\_mCherry\_ALFA. The first column represents the GFP channel (green), the second column is the mCherry channel (red), the third column is the overlay of the two channels, showing the colocalization (indicated in yellow) of the anti-gp41\_Nb with mitochondrial **(A-C)**, nuclear **(D-F)**, and filaments **(G-H)** baits carrying different tags; the fourth column represents the nuclear Hoechst staining (blue) and the fifth column is the merge of all three channels (with the scale bar in white (15  $\mu$ m) on the bottom right corner). Images were taken 24 hours post transfection. Transfected constructs are indicated at the left of each row and the single and merge channels are indicated at the top of the respective columns. The figures are from a representative experiment.

Figure S5

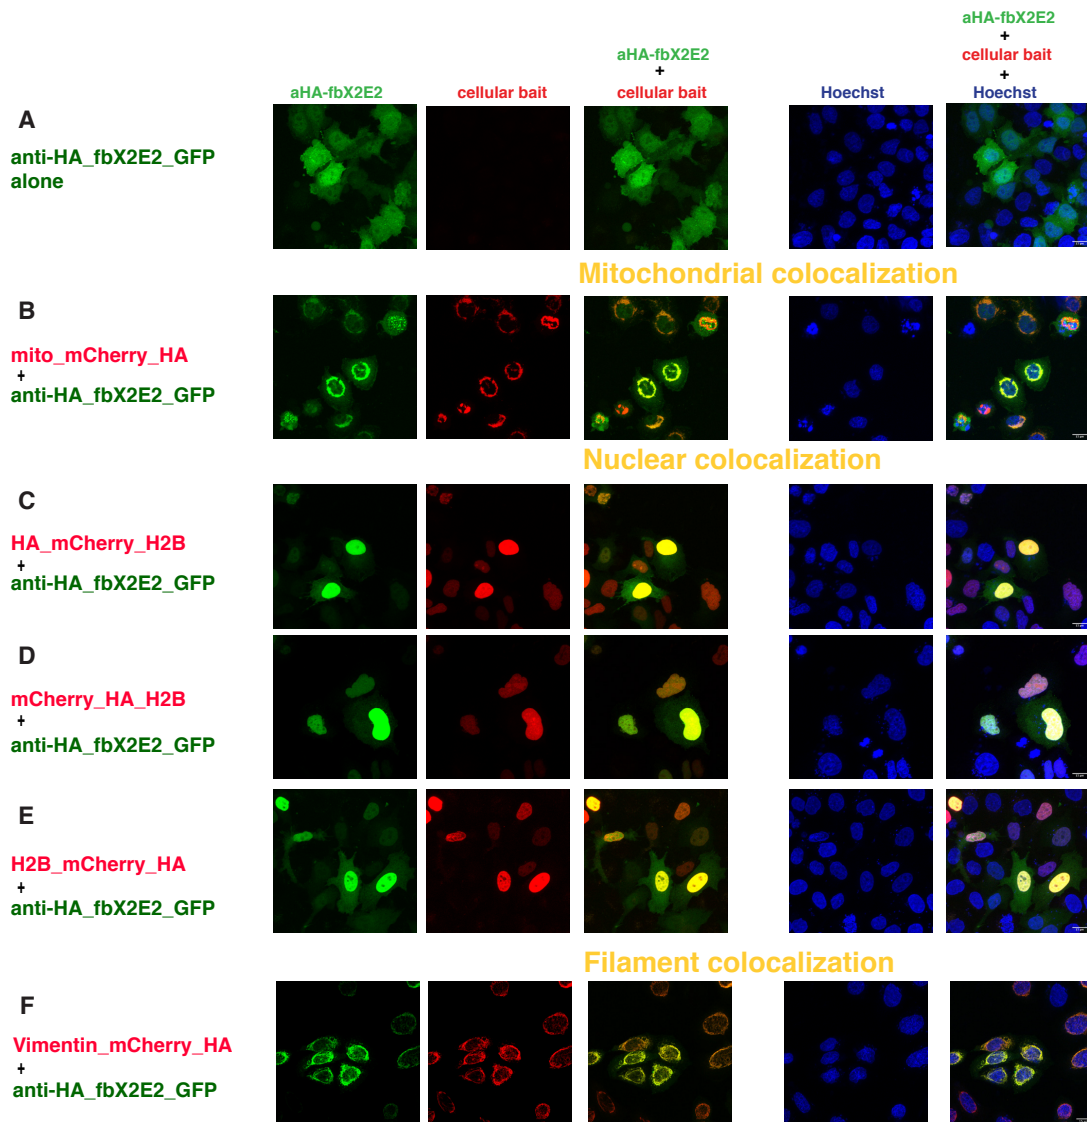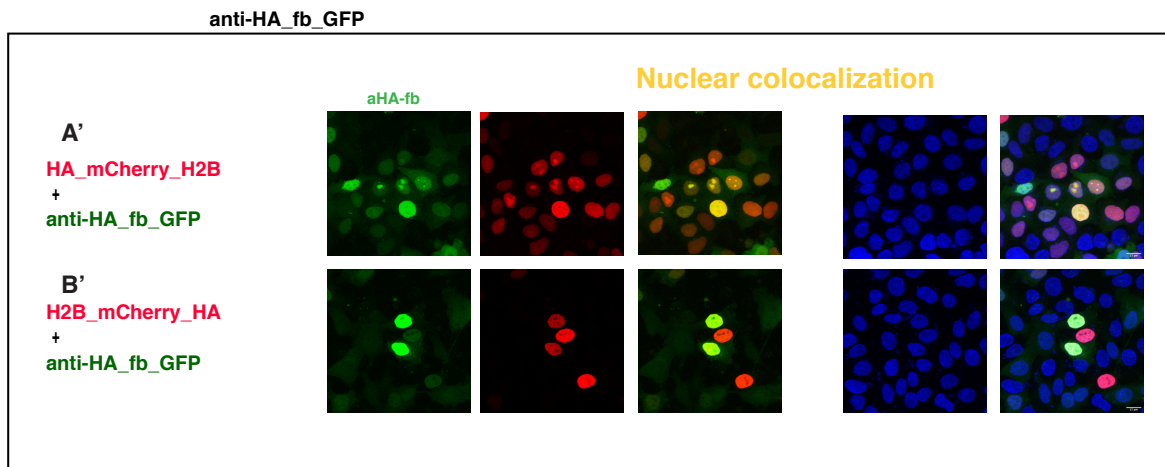

**Figure S5. Intracellular binding of anti-HA\_fbX2E2\_GFP and extra nuclear colocalization of anti-HA\_fb\_GFP (HA system)**

Confocal images of HeLa cells transiently transfected with **(A)** anti-HA\_fbX2E2\_GFP alone; the combination of anti-HA\_fbX2E2\_GFP and **(B)** mito\_mCherry\_HA; **(C)** HA\_mCherry\_H2B; **(D)** mCherry\_HA\_H2B; **(E)** H2B\_mCherry\_H2B; **(F)** Vimentin\_mCherry\_HA. The confocal images in lower black frame represent the cotransfection of anti-HA\_fb\_GFP with **(A')** HA\_mCherry\_H2B or **(B')** H2B\_mCherry\_HA. The first column represents the GFP channel (green), the second column is the mCherry channel (red), the third column is the overlay of the two channels, showing the colocalization (indicated in yellow) of the anti-HA\_scFvs with the respective mitochondrial **(B)**, nuclear **(C-E, A'-B')** and filaments **(F)** baits; the fourth column represents the nuclear Hoechst staining (blue) and the fifth column is the merge of all three channels (with the scale bar in white (15  $\mu$ m) on the bottom right corner). Images were taken 24 hours post transfection. Transfected constructs are indicated at the left of each row and the single and merge channels are indicated at the top of the respective columns. The figures are from a representative experiment, performed at least three times.

Figure S6

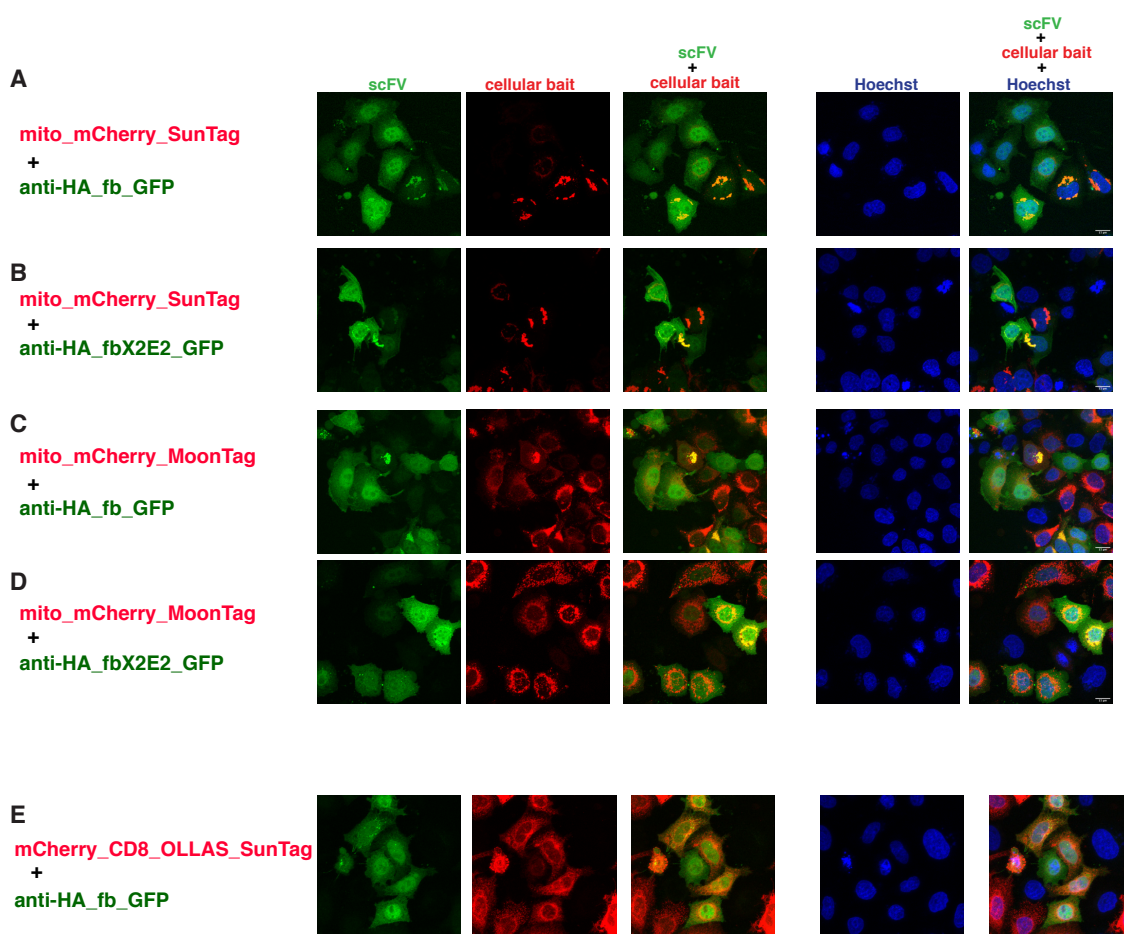

**Figure S6. Negative mitochondrial and membrane controls of anti-HA\_scFvs**

Confocal images of HeLa cells transiently transfected with the combination of anti-HA\_fb\_GFP (A, C, E) or anti-HA\_fbX2E2\_GFP (B, D) and (A-B) mito\_mCherry\_SunTag, (C-D) mito\_mCherry\_MoonTag, (E) mCherry\_CD8\_OLLAS\_SunTag. The first column represents the GFP channel (green), the second column is the mCherry channel (red), the third column is the overlay of the two channels, showing the colocalization (indicated in yellow) of the anti-HA\_scFvs with mitochondrial (A-D), and membrane (E) baits carrying different tags; the fourth column represents the nuclear Hoechst staining (blue) and the fifth column is the merge of all three channels (with the scale bar in white (15  $\mu$ m) on the bottom right corner). Images were taken 24 hours post transfection. Transfected constructs are indicated at the left of each row and the single and merge channels are indicated at the top of the respective columns. The figures are from a representative experiment.

Figure S7

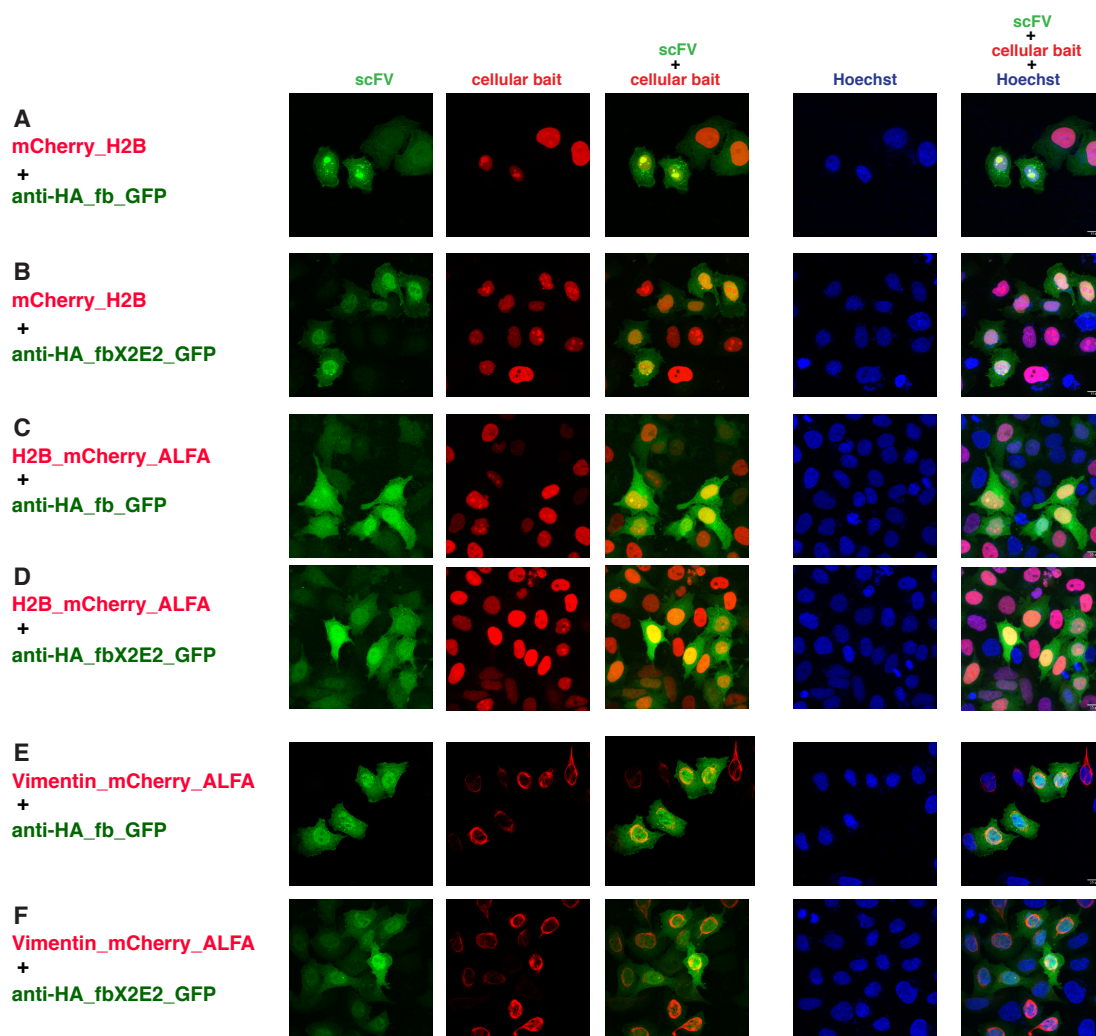

**Figure S7. Negative nuclear and filaments controls of anti-HA\_scFvs**

Confocal images of HeLa cells transiently transfected with the combination of anti-HA\_fb\_GFP (A, C, E) or anti-HA\_fbX2E2\_GFP (B, D, F) and (A-B) mCherry\_H2B, (C-D) H2B\_mCherry\_ALFA, (E-F) Vimentin\_mCherry\_ALFA. The first column represents the GFP channel (green), the second column is the mCherry channel (red), the third column is the overlay of the two channels, showing the colocalization (indicated in yellow) of the anti-HA\_scFvs with nuclear (A-D), and filaments (E-F) baits carrying different tags; the fourth column represents the nuclear Hoechst staining (blue) and the fifth column is the merge of all three channels (with the scale bar in white (15 µm) on the bottom right corner). Images were taken 24 hours post transfection. Transfected constructs are indicated at the left of each row and the single and merge channels are indicated at the top of the respective columns. The figures are from a representative experiment.

Figure S8

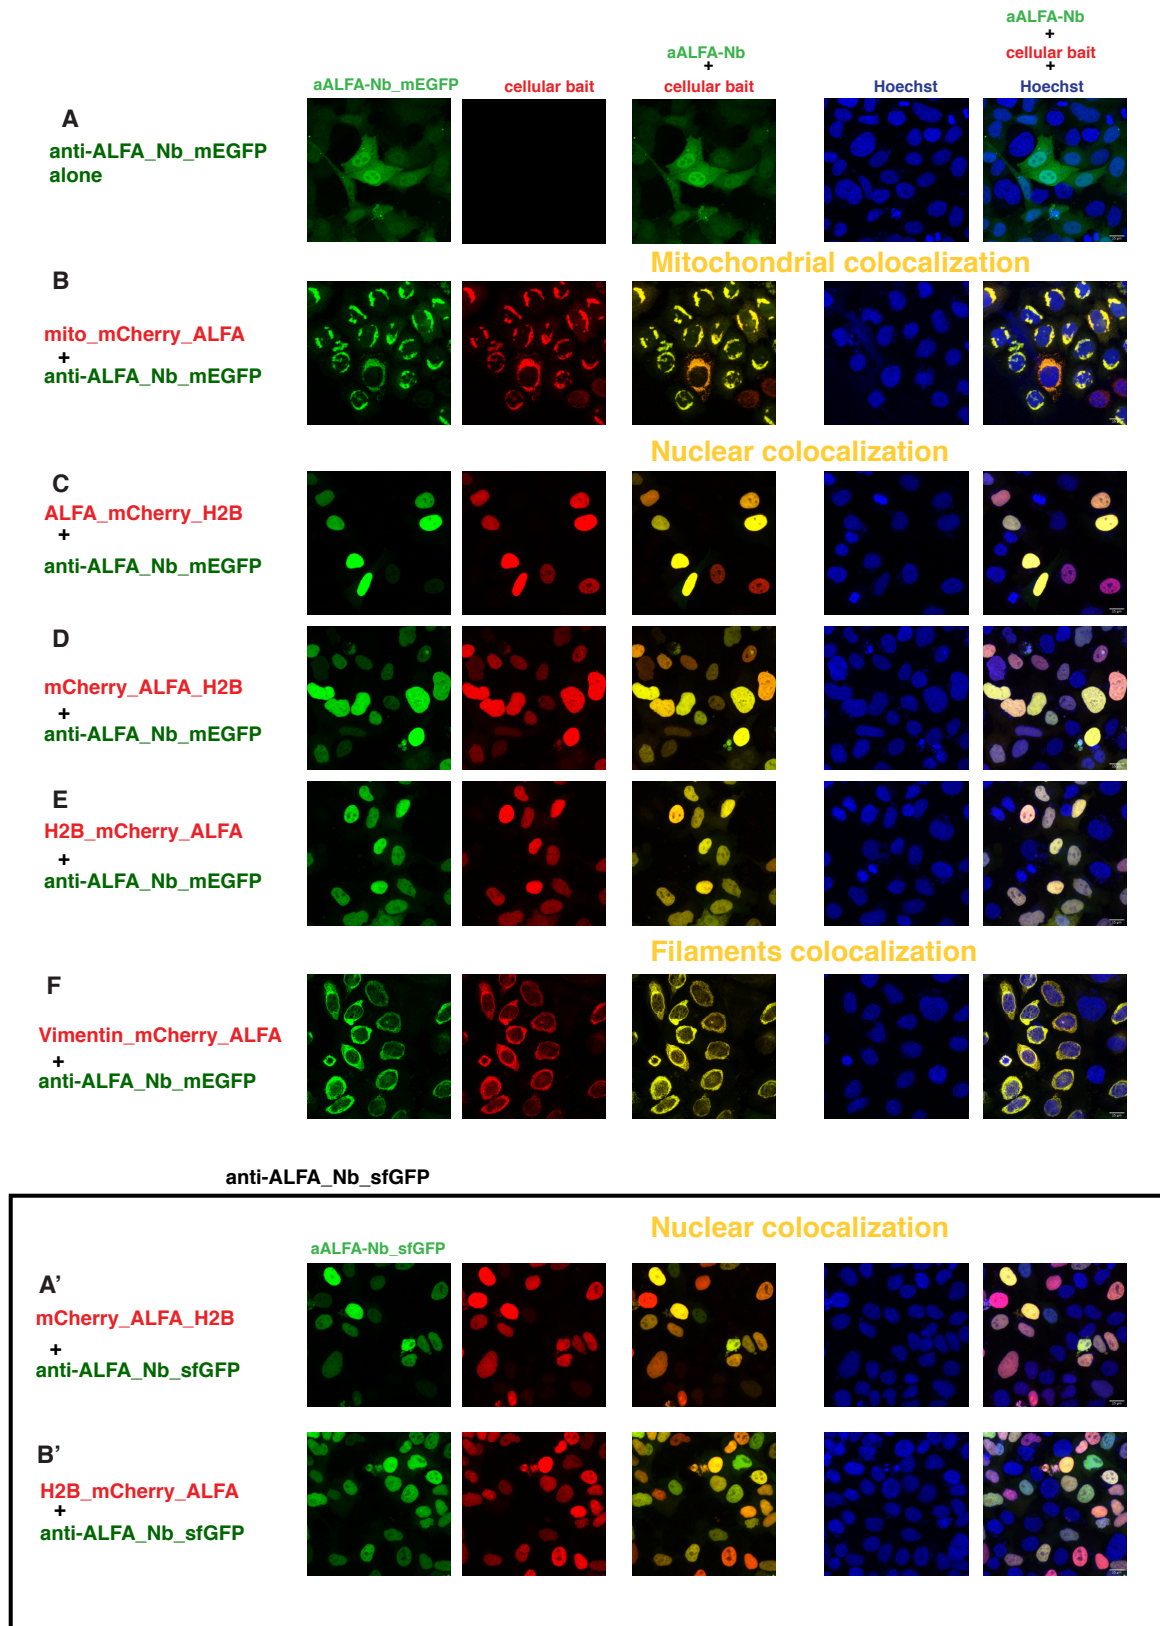

**Figure S8. Intracellular binding of anti-ALFA\_Nb\_mEGFP and extra nuclear colocalization of anti-ALFA\_Nb\_sfGFP**

Confocal images of HeLa cells transiently transfected with **(A)** anti-ALFA\_Nb\_mEGFP alone; the combination of anti-ALFA\_Nb\_mEGFP and **(B)** mito\_mCherry\_ALFA; **(C)** ALFA\_mCherry\_H2B; **(D)** mCherry\_ALFA\_H2B; **(E)** H2B\_mCherry\_ALFA; **(F)** Vimentin\_mCherry\_ALFA. The confocal images in lower black frame represent the cotransfection of anti-ALFA\_Nb\_sfGFP with **(A')** mCherry\_ALFA\_H2B or **(B')** H2B\_mCherry\_ALFA. The first column represents the GFP channel (green), the second column is the mCherry channel (red), the third column is the overlay of the two channels, showing the colocalization (indicated in yellow) of the anti-ALFA Nanobodies with the respective mitochondrial **(B)**, nuclear **(C-E, A'-B')** and filaments **(F)** baits; the fourth column represents the nuclear Hoechst staining (blue) and the fifth column is the merge of all three channels (with the scale bar in white (15  $\mu$ m) on the bottom right corner). Images were taken 24 hours post transfection. Transfected constructs are indicated at the left of each row and the single and merge channels are indicated at the top of the respective columns. The figures are from a representative experiment, performed at least three times.

Figure S9A

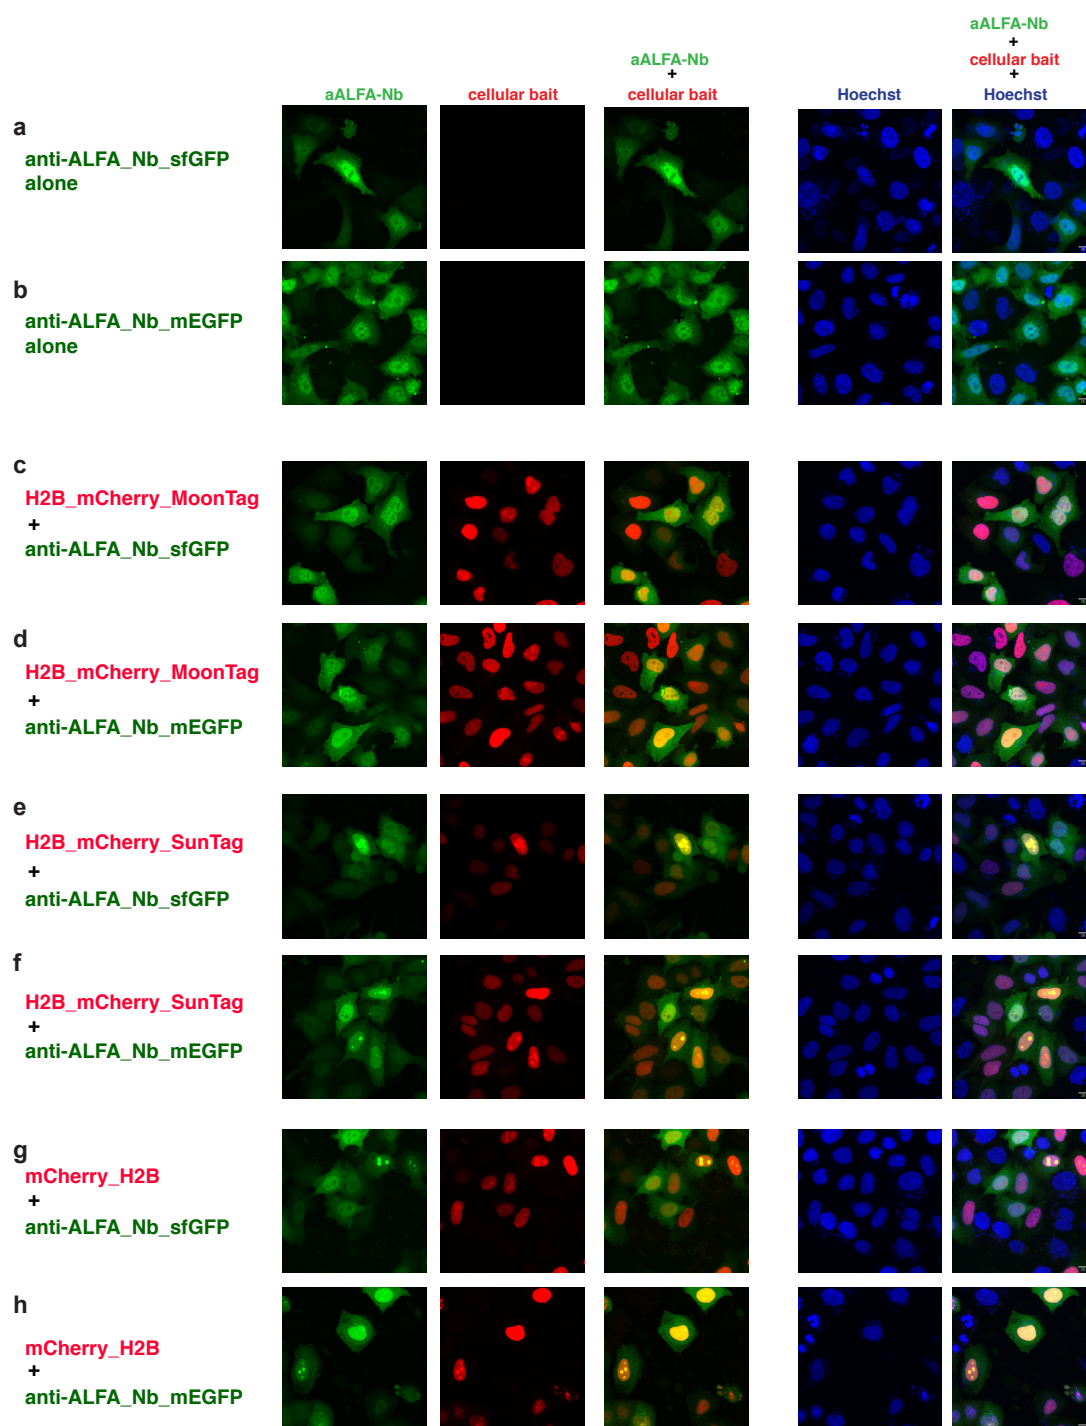



### Figure S9A. Negative nuclear controls of anti-ALFA nanobodies

Confocal images of HeLa cells transiently transfected with anti-ALFA\_Nb\_sfGFP (**a, c, e** and **g**) or anti-ALFA\_Nb\_mEGFP (**b, d, f** and **h**)\_alone (**a-b**) or in combination with (**c-d**) H2B\_mCherry\_MoonTag, (**e-f**) H2B\_mCherry\_SunTag, (**G-H**) mCherry\_H2B. The first column represents the GFP channel (green), the second column is the mCherry channel (red), the third column is the overlay of the two channels, showing the colocalization (indicated in yellow) of the anti-ALFA nanobody with nuclear (**c-h**) baits carrying different tags; the fourth column represents the nuclear Hoechst staining (blue) and the fifth column is the merge of all three channels (with the scale bar in white (15  $\mu\text{m}$ ) on the bottom right corner). Images were taken 24 hours post transfection. Transfected constructs are indicated at the left of each row and the single and merge channels are indicated at the top of the respective columns. The figures are from a representative experiment.

Figure S9B

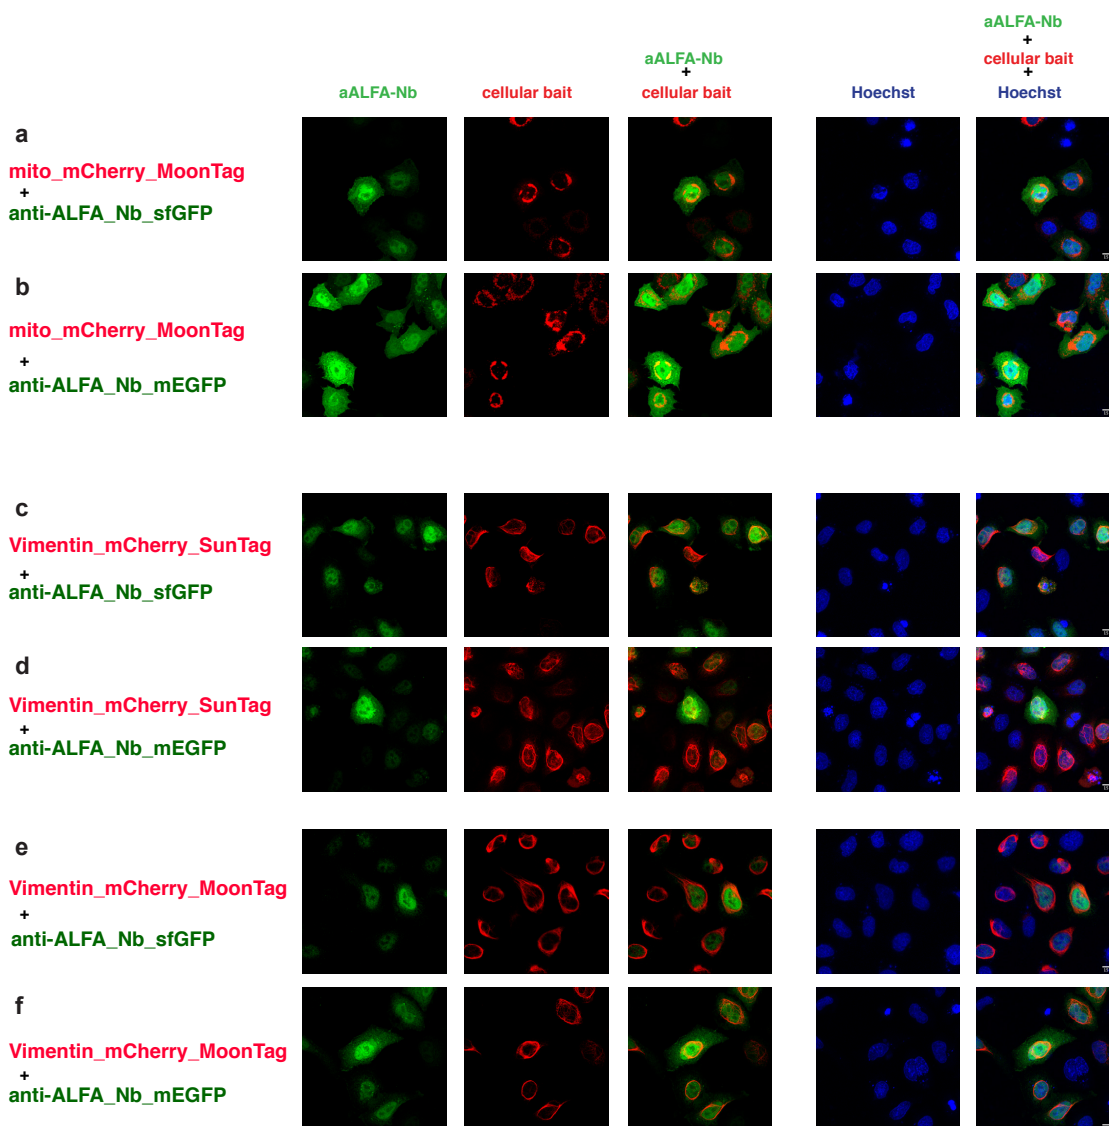

**Figure S9B. Negative mitochondrial and filaments controls of anti-ALFA nanobodies**

Confocal images of HeLa cells transiently transfected with the combination of anti-ALFA\_Nb\_sfGFP (**a, c, e**) or anti-ALFA\_Nb\_mEGFP (**b, d, f**) and (**a-b**)

mito\_mCherry\_MoonTag, (**c-d**) Vimentin\_mCherry\_SunTag, (**e-f**)

Vimentin\_mCherry\_MoonTag1. The first column represents the GFP channel (green), the second column is the mCherry channel (red), the third column is the overlay of the two channels, showing the colocalization (indicated in yellow) of the anti-ALFA nanobodies with mitochondrial (**a-b**), and filaments (**c-f**) baits carrying different tags; the fourth column represents the nuclear Hoechst staining (blue) and the fifth column is the merge of all three channels (with the scale bar in white (15  $\mu$ m) on the bottom right corner). Images were taken 24 hours post transfection. Transfected constructs are indicated at the left of each row and the single and merge channels are indicated at the top of the respective columns. The figures are from a representative experiment.

## Figure S10

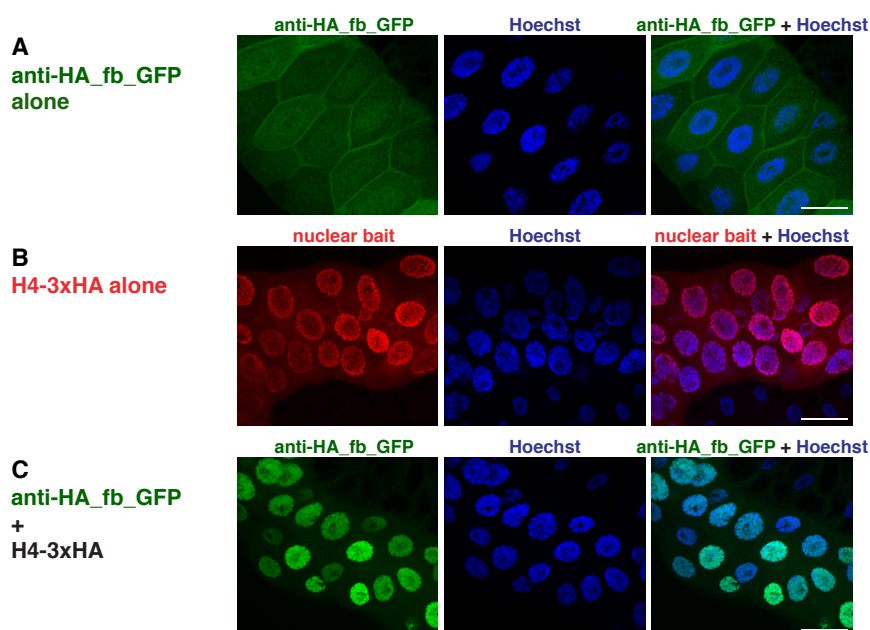

**Figure S10. Intracellular binding of anti-HA\_fb\_GFP (HA system) *in vivo***

Confocal images of *Drosophila* larval salivary glands expressing anti-HA\_fb\_GFP alone (A), the nuclear bait H4-3xHA alone (B), or a combination of anti-HA\_fb\_GFP and H4-3xHA (C). The first column represents the GFP channel (green, A and C) or the anti-HA staining channel (red, B). The second column represents the nuclear Hoechst staining (blue) and the third column is the merge of the two respective channels. Scale bars are 50  $\mu\text{m}$ . Salivary glands were obtained from third instar *Drosophila* larvae expressing the UAS constructs indicated at the left of each row using brk-GAL4 as a driver. Single and merged channels are indicated at the top of the respective channel.

## Figure S11

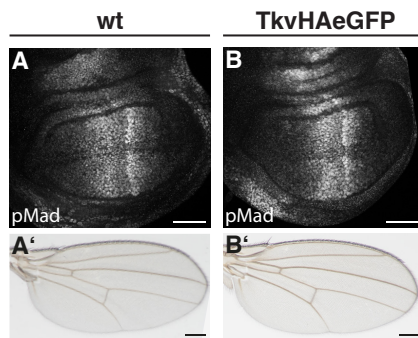

### Figure S11. Validation of TkvHAeGFP activity

Confocal images of pMad distribution in 3<sup>rd</sup> instar larval wing imaginal discs and adult wings of wild-type flies (**A and A'**) or flies homozygous for the generated *tkvHAeGFP* allele (**B and B'**). Scale bars are 50  $\mu$ m (larval discs) and 200  $\mu$ m (adult wings).

## Figure S12

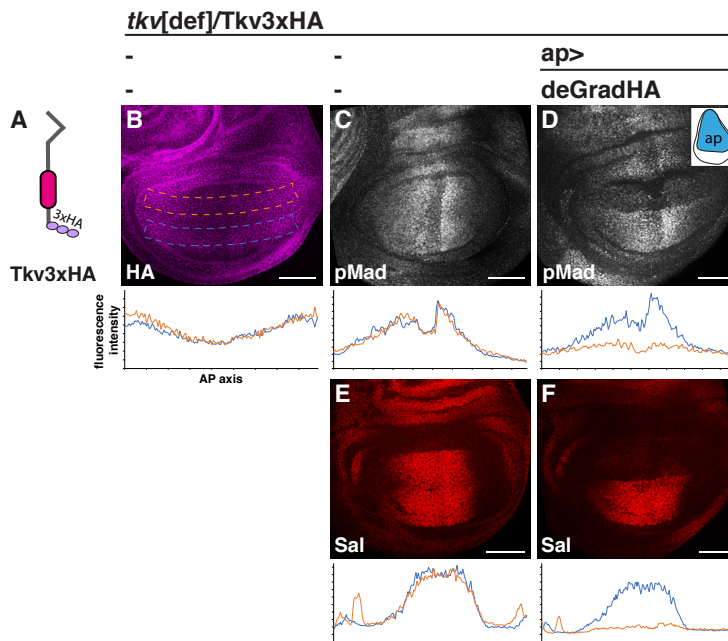**Figure S12. Manipulation of endogenously 3xHA-tagged proteins by deGradHA**

Schematic representation (A) and wing disc expression (B) of an endogenously tagged TkV version with three copies of HA. Confocal images of pMad and Sal distribution in 3<sup>rd</sup> instar wing imaginal discs of larvae carrying the *tkv3xHA* allele over a *tkv* chromosomal deficiency (C, E) or larvae which additionally express deGradHA under the control of ap-GAL4 in the dorsal compartment (D, F). Plots below each panel depict relative fluorescent intensity of ventral (control, blue) and dorsal (experimental, orange) cells along the AP axis of the wing pouch (coloured boxes in panel B indicate areas used for quantification). Note the strong reduction of pMad and the complete absence of Sal in dorsal cells in panels D and F, respectively. Scale bars are 50  $\mu\text{m}$ .

**Table S1**

| peptide binders construct | aa sequence (color scheme as in Fig.1)                                                                                                                                                                                                                                                                                                                                                                                                                                                                                                                                                                 |
|---------------------------|--------------------------------------------------------------------------------------------------------------------------------------------------------------------------------------------------------------------------------------------------------------------------------------------------------------------------------------------------------------------------------------------------------------------------------------------------------------------------------------------------------------------------------------------------------------------------------------------------------|
| anti-GCN4_scFv_GFP        | MGPDIVMTQSPSSLSASVGDRTVITCRSSTGAVTTSNYASWVQEKPGKLFKGLIGGTNNRAGVPSRFSGLIGDKATLTISSLQPEDFATYFCALWYSNHWVFGQGTQKVELKRRGGGGGGGGGGGGGGGGGGSEVKKLESGGGLVQPGGSLKSCAVSGFSLTDYGVNWNVVRQAPGRGLEWIGVIWGDGITDYNALKDRFIISKDNGKNTVYLQMSKVRSDDTALYYCVTGLFDYWGQGTTLVTVSSYPYDVPDYAGGGGGGGGGGGGGGGGGSLDPGGGGSGKGEELFTGVVPIVLVDGDNVNGHKFSVRGEGEGDATNGKLTGKLFICTTGKLPVWPPTLVTTLTLYGVQCFSRYPDHMKRHDFKFSAMPEGYVQERTISFKDDGTYKTRAEVKFEGDTLVNRIELKIDFKEDGNILGHKLEYNFNHSHNVYITADKQKNGIKANFKIRHNVEDGSQLADHYQQNTPIGDGPVLLPDNHYLSTQSVLSKDPNEKRDMHMLVLEFVTAAGITHGMDELYKGGGRTEEYKLILNGKTLKGETTTEAVDAATAEKVFKQYANDNGVDGEWYDDATKTFTVTE* |
| anti-gp41_Nb_GFP          | MEVQLVESGGGLVQPQGSRLRSCAASGSISSVDMSWYRQAPGKQRELVAFITDRGRNTNYKSVKGRFTISRDNKSNMVMYLQMSLKPEDTADYLCRAESRTSWSSPSPLDVWGRGTQVTVSSLDPPGGGGSGKGEELFTGVVPIVLVDGDNVNGHKFSVRGEGEGDATNGKLTGKLFICTTGKLPVWPPTLVTTLTLYGVQCFSRYPDHMKRHDFKFSAMPEGYVQERTISFKDDGTYKTRAEVKFEGDTLVNRIELKIDFKEDGNILGHKLEYNFNHSHNVYITADKQKNGIKANFKIRHNVEDGSQLADHYQQNTPIGDGPVLLPDNHYLSTQSVLSKDPNEKRDMHMLVLEFVTAAGITHGMDELYKGGGRTEEYKLILNGKTLKGETTTEAVDAATAEKVFKQYANDNGVDGEWYDDATKTFTVTE*                                                                                                                                                        |
| anti-HA_fb_GFP            | MAEVKLVESGGGLVQPGGSLKSCAASGFTFSSYGMWVRQTPDKRLEWVATISRGGSYTYPPDSVKGRFTISRDNKNTLYLQMSLSRSEDTAIYYCARRETYDEKGFAYWGQGTTLTVSSGGGGGGGGGGGGGGGGSDIVLTQSPASLTVSLGQRATISCKSSQSLNSGNQKNYLTWYQQKPGQPPKLLIYWASTRESGIPARFSGSGSGTDFTLNIHPVEEEDAATYYCQNDNSHPLTFGGGKLEIKRAAAKGEFEGGGGGGGGGGGGGGGGGGGGGSGKGEELFTGVVPIVLVDGDNVNGHKFSVSGEGEGDATYGLTKLFICTTGKLPVWPPTLVTTLTLYGVQCFSRYPDHMKQHDFKFSAMPEGYVQERTIFFKDDGNYKTRAEVKFEGDTLVNRIELKIDFKEDGNILGHKLEYNFNHSHNVYIMADKQKNGIKVNFKIRHNIEDGSQLADHYQQNTPIGDGPVLLPDNHYLSTQSVLSKDPNEKRDMHMLVLEFVTAAGITLGMDELYK*                                                                   |
| anti-HA_fbX2E2_GFP        | MAEVKLVESGGDLVQPGGSLKSCAASGFTFSSYGMWVRQTPDKRLEWVATISRGGSYTYPPDSVKGRFTISRDNKNTLYLQMSLSKSEDAMYYCARRETYDEKGFAYWGQGTTLTVSSGGGGGGGGGGGGGGGGSDIVLTQSPASLAVSLGQRATISCKSSQSLNSGNQKNYLTWYQQKPGQPPKLLIYWASTRESGIPARFSGSGSGTDFTLNIHPVEEEDAATYYCQNDNSHPLTFGGGKLEIKRAAAKGEFEGGGGGGGGGGGGGGGGGGGGGSGKGEELFTGVVPIVLVDGDNVNGHKFSVSGEGEGDATYGLTKLFICTTGKLPVWPPTLVTTLTLYGVQCFSRYPDHMKQHDFKFSAMPEGYVQERTIFFKDDGNYKTRAEVKFEGDTLVNRIELKIDFKEDGNILGHKLEYNFNHSHNVYIMADKQKNGIKVNFKIRHNIEDGSQLADHYQQNTPIGDGPVLLPDNHYLSTQSVLSKDPNEKRDMHMLVLEFVTAAGITLGMDELYK*                                                                    |
| anti-ALFA_Nb_sfGFP        | MGSGDASDSEVQLQESGGGLVQPGGSLRSLCTASGVTISALNAMAMGWYRQAPGERRVMVAASVSRGNAMYRESVQGRFTVTRDFTNKMMVSLQMDNLKPEDTAVYYCHVLEDRVDSFHDYWGQGTQVTVSSEPKTPKPTSGSSKGEELFTGVVPIVLVDGDNVNGHKFSVRGEGEGDATNGKLTGKLFICTTGKLPVWPPTLVTTLTLYGVQCFSRYPDHMKRHDFKFSAMPEGYVQERTISFKDDGTYKTRAEVKFEGDTLVNRIELKIDFKEDGNILGHKLEYNFNHSHNVYITADKQKNGIKANFKIRHNVEDGSQLADHYQQNTPIGDGPVLLPDNHYLSTQSVLSKDPNEKRDMHMLVLEFVTAAGITHGMDELYKGGGRTEEYKLILNGKTLKGETTTEAVDAATAEKVFKQYANDNGVDGEWYDDATKTFTVTE*                                                                                                                                            |
| anti-ALFA_Nb_mEGFP        | MGSGDASDSEVQLQESGGGLVQPGGSLRSLCTASGVTISALNAMAMGWYRQAPGERRVMVAASVSRGNAMYRESVQGRFTVTRDFTNKMMVSLQMDNLKPEDTAVYYCHVLEDRVDSFHDYWGQGTQVTVSSEPKTPKPTSGSSKGEELFTGVVPIVLVDGDNVNGHKFSVSGEGEGDATYGLTKLFICTTGKLPVWPPTLVTTLTLYGVQCFSRYPDHMKQHDFKFSAMPEGYVQERTIFFKDDGNYKTRAEVKFEGDTLVNRIELKIDFKEDGNILGHKLEYNFNHSHNVYIMADKQKNGIKVNFKIRHNIEDGSQLADHYQQNTPIGDGPVLLPDNHYLSTQSVLSKDPNEKRDMHMLVLEFVTAAGITLGMDELYK*                                                                                                                                                                                                          |
|                           | Ns limb is shown in red                                                                                                                                                                                                                                                                                                                                                                                                                                                                                                                                                                                |
| deGradHA                  | MMKMETDKIMDETNSNAQAFITMLYDPRKKSSTPYQTERELCFYFTQWSESGQVDFVEHLLSRMCHYQHGGQINAYLKPMLQRDFITLLPIKGLDHIAENILSYLDAESLKSSELVCKEWRVISEGMLWKKLIERKVRTDSLWRGLAERRNWMQYLFKPRPGQTRPHSFHRELFKIMNDIDSIENNWRTRGRLERSTSMAEVKLVESGGGLVQPGGSLKSCAASGFTFSSYGMWVRQTPDKRLEWVATISRGGSYTYPPDSVKGRFTISRDNKNTLYLQMSLSRSEDTAIYYCARRETYDEKGFAYWGQGTTLTVSSGGGGGGGGGGGGGGGGSDIVLTQSPASLTVSLGQRATISCKSSQSLNSGNQKNYLTWYQQKPGQPPKLLIYWASTRESGIPARFSGSGSGTDFTLNIHPVEEEDAATYYCQNDNSHPLTFGGGKLEIKRATS*                                                                                                                                     |

Amino acid sequences of the fusion proteins containing the peptide binders of this study. Color codes are the same as in Figure 1. For deGradHA, the Ns limb part is shown in red.
